# Supplementary material
Source: PubMed Central journal article supplement (PMC5826149)
Supplement: AAC.01947-17_zac003186945s1.pdf [file AAC.01947-17_zac003186945s1.pdf]

## 1 Supplementary data

2 **Table S1. Primers used in the study.**

| Primers                                      | Sequences (5'-3')             | Reference   |
|----------------------------------------------|-------------------------------|-------------|
| <i>bla</i> <sub>TEM</sub> -specific-C1       | GGGAATTCTCGGGGAAATGTGCGCGGAAC | (1)         |
| <i>bla</i> <sub>TEM</sub> -specific-C2       | GGGATCCGAGTAAACTTGGTCTGACAG   | (1)         |
| <i>bla</i> <sub>ADC</sub> -F                 | ATGCGATTTAAAAAATTTCTTGTC      | This study  |
| <i>bla</i> <sub>ADC</sub> -R                 | TTTCTTTATTGCATTCAGCAC         | This study  |
| TEM Promo F                                  | ATAAAATTCTTGAAGAC             | (2)         |
| TEM Promo R                                  | TTACCAATGCTTAATCA             | (2)         |
| <i>ISAbal</i> - <i>bla</i> <sub>ADC</sub> -F | CACGAATGCAGAAGTTG             | This study  |
| RT TEM-F                                     | TTTTTGCGGCATTTTGCCTT          | (3)         |
| RT TEM-R                                     | GGGCGAAAACCTCTCAAGG ATC       | (3)         |
| qPCR for ADC -F                              | ACGCCTGGTAAGTATTGGAAAG        | (4)         |
| qPCR for ADC-R                               | ACCGATTGAGTTTTTAGGTTCC        | (4)         |
| qPCR for <i>rpoB</i> -F                      | GAG TCT AAT GGC GGT GGT TC    | (4) and (5) |
| qPCR for <i>rpoB</i> -R                      | ATT GCT TCA TCT GCT GGT TG    | (4) and (5) |

3

4

## 5 References

- 6 1. Nemeč A, Krizová L, Maixnerová M, Diancourt L, van der Reijden TJ, Brisse S, van den Broek  
7 P, Dijkshoorn L. 2008. Emergence of carbapenem resistance in *Acinetobacter baumannii* in the  
8 Czech Republic is associated with the spread of multidrug-resistant strains of European clone

- 9 II. J Antimicrob Chemother 62:484-9.
- 10 2. Waltner-Toews RI, Paterson DL, Qureshi ZA, Sidjabat HE, Adams-Haduch JM, Shutt KA,  
11 Jones M, Tian GB, Pasculle AW, Doi Y. 2011. Clinical characteristics of bloodstream infections  
12 due to ampicillin-sulbactam-resistant, non-extended- spectrum-beta-lactamase-producing  
13 *Escherichia coli* and the role of TEM-1 hyperproduction. Antimicrob Agents Chemother  
14 55:495-501.
- 15 3. Krizova L, Poirel L, Nordmann P, Nemeč A. 2013. TEM-1 beta-lactamase as a source of  
16 resistance to sulbactam in clinical strains of *Acinetobacter baumannii*. J Antimicrob Chemother  
17 68:2786-91.
- 18 4. Kuo SC, Lee YT, Yang Lauderdale TL, Huang WC, Chuang MF, Chen CP, Su SC, Lee KR,  
19 Chen TL. 2015. Contribution of *Acinetobacter*-derived cephalosporinase-30 to sulbactam  
20 resistance in *Acinetobacter baumannii*. Front Microbiol 6:231.
- 21 5. Hornsey M, Ellington MJ, Doumith M, Thomas CP, Gordon NC, Wareham DW, Quinn J, Lolans  
22 K, Livermore DM, Woodford N. 2010. AdeABC-mediated efflux and tigecycline MICs for  
23 epidemic clones of *Acinetobacter baumannii*. J Antimicrob Chemother 65:1589-93.
- 24

Table S2. Clinical information and characteristics of the *A. baumannii* strains in the study.

| Strain | Age | Sex    | Specimen             | Diagnosis               | Ward                  | Region    | ST(Oxford) | ST(Pasteur) | Subbactam MIC(mg/L) | <i>bla</i> <sub>TEM</sub>    | <i>bla</i> <sub>TEM</sub> Promoter | Relative expression of <i>bla</i> <sub>TEM</sub> | Copy number of <i>bla</i> <sub>TEM</sub> | <i>ampC</i> allele | accession number | ADC protein variant | protein ID | <i>ISAbal</i> | Relative expression of <i>ampC</i> | Copy number of <i>ampC</i> |
|--------|-----|--------|----------------------|-------------------------|-----------------------|-----------|------------|-------------|---------------------|------------------------------|------------------------------------|--------------------------------------------------|------------------------------------------|--------------------|------------------|---------------------|------------|---------------|------------------------------------|----------------------------|
| WE1572 | -   | -      | -                    | -                       | -                     | Zhejiang  | 1562       | 490         | 0.25                | None                         | None                               | NT                                               | NT                                       | 49                 | MG601727         | ADC-99              |            | None          | 0.01 ± 0.00                        | 1.30 ± 0.41                |
| JX101  | -   | -      | -                    | -                       | -                     | Zhejiang  | 1563       | 216         | 0.5                 | None                         | None                               | NT                                               | NT                                       | 50                 | MG601726         | ADC-154             | AUD40655   | None          | 0.03 ± 0.01                        | 1.23 ± 0.15                |
| SH37   | -   | -      | -                    | -                       | -                     | Shanghai  | 620        | 575         | 1                   | None                         | None                               | NT                                               | NT                                       | 10                 |                  | ADC-76              |            | None          | 0.04 ± 0.00                        | 0.57 ± 0.03                |
| N8     | 59  | Male   | Sputum               | Pulmonary tumor         | Pneumology            | Zhejiang  | 744        | 150         | 1                   | None                         | None                               | NT                                               | NT                                       | 51                 | MG601728         | ADC-163             | AUD40657   | None          | 0.05 ± 0.01                        | 0.64 ± 0.08                |
| SH40   | -   | -      | -                    | -                       | -                     | Shanghai  | 585        | 10          | 1                   | None                         | None                               | NT                                               | NT                                       | 10                 |                  | ADC-76              |            | None          | 0.06 ± 0.01                        | 0.56 ± 0.02                |
| A369   | 78  | Male   | Sputum               | -                       | Neurosurgery          | Guangdong | 373        | 40          | 1                   | None                         | None                               | NT                                               | NT                                       | 36                 | MF164462         | ADC-155             | ARX71325   | None          | 0.01 ± 0.00                        | 1.22 ± 0.41                |
| B30    | -   | -      | -                    | -                       | -                     | Beijing   | 1564       | 193         | 1                   | None                         | None                               | NT                                               | NT                                       | 52                 | MG601729         | ADC-156             | AUD40658   | None          | 0.02 ± 0.00                        | 1.11 ± 0.23                |
| LS066  | -   | -      | -                    | -                       | -                     | Zhejiang  | 1603       | 1156        | 1                   | None                         | None                               | NT                                               | NT                                       | 53                 | MF164464         | ADC-157             | ARX71327   | None          | 0.01 ± 0.00                        | 1.15 ± 0.25                |
| T12    | 70  | Female | Sputum               | Cerebral hemorrhage     | Neurosurgery          | Zhejiang  | 553        | 193         | 1                   | None                         | None                               | NT                                               | NT                                       | 52                 |                  | ADC-156             |            | None          | 0.01 ± 0.00                        | 1.14 ± 0.01                |
| WE1926 | -   | -      | -                    | -                       | -                     | Zhejiang  | 1591       | 329         | 1                   | None                         | None                               | NT                                               | NT                                       | 54                 | MG601730         | ADC-6               |            | None          | 0.03 ± 0.01                        | 1.10 ± 0.24                |
| JX214  | -   | -      | -                    | -                       | -                     | Zhejiang  | 605        | 106         | 1                   | None                         | None                               | NT                                               | NT                                       | 55                 | MG601731         | ADC-164             | AUD40660   | None          | 0.02 ± 0.01                        | 0.96 ± 0.36                |
| JX111  | -   | -      | -                    | -                       | -                     | Zhejiang  | 1537       | 36          | 1                   | None                         | None                               | NT                                               | NT                                       | 56                 | MG601732         | ADC-26              |            | None          | 0.00 ± 0.00                        | 1.03 ± 0.17                |
| JX204  | -   | -      | -                    | -                       | -                     | Zhejiang  | 383        | 36          | 2                   | None                         | None                               | NT                                               | NT                                       | 56                 |                  | ADC-26              |            | None          | 0.02 ± 0.01                        | 1.06 ± 0.46                |
| B6     | -   | -      | -                    | -                       | -                     | Beijing   | 1538       | 1157        | 2                   | None                         | None                               | NT                                               | NT                                       | 52                 |                  | ADC-156             |            | None          | 0.01 ± 0.00                        | 0.80 ± 0.22                |
| WE2714 | -   | -      | -                    | -                       | -                     | Zhejiang  | 1539       | 52          | 2                   | None                         | None                               | NT                                               | NT                                       | 38                 |                  | ADC-158             |            | None          | 0.01 ± 0.00                        | 0.89 ± 0.16                |
| B7     | -   | -      | -                    | -                       | -                     | Beijing   | 1540       | 341         | 2                   | None                         | None                               | NT                                               | NT                                       | 57                 | MG601734         | ADC-166             | AUD40663   | None          | 0.02 ± 0.00                        | 1.59 ± 63                  |
| JX106  | -   | -      | -                    | -                       | -                     | Zhejiang  | 520        | 40          | 2                   | None                         | None                               | NT                                               | NT                                       | 36                 |                  | ADC-155             |            | None          | 0.03 ± 0.03                        | 1.23 ± 0.65                |
| LS0178 | -   | -      | -                    | -                       | -                     | Zhejiang  | 883        | 77          | 2                   | None                         | None                               | NT                                               | NT                                       | 56                 |                  | ADC-26              |            | None          | 0.03 ± 0.01                        | 0.81 ± 0.15                |
| LSP80  | -   | -      | -                    | -                       | -                     | Zhejiang  | 867        | 239         | 2                   | None                         | None                               | NT                                               | NT                                       | 60                 | MG601733         | ADC-165             | AUD40662   | None          | 0.01 ± 0.00                        | 0.83 ± 0.08                |
| SH25   | -   | -      | -                    | -                       | -                     | Shanghai  | 1592       | 1158        | 2                   | None                         | None                               | NT                                               | NT                                       | 56                 |                  | ADC-26              |            | None          | 0.01 ± 0.00                        | 0.78 ± 0.20                |
| T10    | 73  | Male   | Sputum               | Respiratory failure     | ICU                   | Zhejiang  | 1593       | 155         | 2                   | None                         | None                               | NT                                               | NT                                       | 58                 | MG601735         | ADC-167             | AUD40664   | None          | 0.06 ± 0.03                        | 0.81 ± 0.12                |
| N9130  | -   | -      | -                    | -                       | -                     | Zhejiang  | 520        | 40          | 2                   | None                         | None                               | NT                                               | NT                                       | 36                 |                  | ADC-155             |            | None          | 0.01 ± 0.00                        | 1.05 ± 0.09                |
| SH27   | -   | -      | -                    | -                       | -                     | Shanghai  | 1594       | 452         | 2                   | None                         | None                               | NT                                               | NT                                       | 16                 | MG702533         | ADC-169             |            | None          | 0.01 ± 0.00                        | 0.66 ± 0.06                |
| N5806  | -   | -      | -                    | -                       | -                     | Zhejiang  | 1595       | 216         | 2                   | None                         | None                               | NT                                               | NT                                       | 60                 |                  | ADC-165             |            | None          | 0.01 ± 0.00                        | 0.53 ± .09                 |
| T16    | 84  | Male   | Sputum               | -                       | Ophthalmology         | Zhejiang  | 1556       | 1161        | 2                   | None                         | None                               | NT                                               | NT                                       | 59                 | MG601736         | ADC-168             |            | None          | 0.00 ± 0.00                        | 0.61 ± 0.08                |
| SH43   | -   | -      | -                    | -                       | -                     | Shanghai  | 1596       | 268         | 2                   | None                         | None                               | NT                                               | NT                                       | 56                 |                  | ADC-26              |            | None          | 0.03 ± 0.01                        | 0.55 ± 0.03                |
| LS0148 | -   | -      | -                    | -                       | -                     | Zhejiang  | 447        | 10          | 4                   | None                         | None                               | NT                                               | NT                                       | 10                 |                  | ADC-76              |            | None          | 0.07 ± 0.02                        | 0.61 ± 0.07                |
| JX215  | -   | -      | -                    | -                       | -                     | Zhejiang  | 1597       | 150         | 4                   | None                         | None                               | NT                                               | NT                                       | 51                 |                  | ADC-163             |            | None          | 0.07 ± 0.01                        | 0.54 ± 0.03                |
| CQ301  | -   | -      | -                    | -                       | -                     | Chongqing | 1598       | 1159        | 4                   | None                         | None                               | NT                                               | NT                                       | 36                 |                  | ADC-155             |            | None          | 0.11 ± 0.03                        | 0.55 ± 0.06                |
| P7     | -   | -      | -                    | -                       | -                     | Zhejiang  | 447        | 10          | 4                   | None                         | None                               | NT                                               | NT                                       | 10                 |                  | ADC-76              |            | None          | 0.07 ± 0.00                        | 0.59 ± 0.04                |
| T17    | 46  | Male   | Sputum               | Cerebral hemorrhage     | Neurosurgery          | Zhejiang  | 208        | 2           | 8                   | None                         | None                               | NT                                               | NT                                       | 2                  |                  | ADC-30              |            | +             | 0.93 ± 0.45                        | 0.67 ± 0.33                |
| A2265  | 68  | Male   | Sputum               | Cerebral infraction     | Rehabilitation        | Shandong  | 368        | 2           | 8                   | None                         | None                               | NT                                               | NT                                       | 19                 |                  | ADC-25              |            | None          | 0.01 ± 0.01                        | 0.78 ± 0.29                |
| A2466  | 69  | Male   | Sputum               | -                       | ICU                   | Henan     | 642        | 23          | 8                   | None                         | None                               | NT                                               | NT                                       | 10                 |                  | ADC-76              |            | None          | 0.02 ± 0.00                        | 1.20 ± 0.46                |
| A2986  | 66  | Male   | Sputum               | Pulmonary disease       | Pneumology            | Shanghai  | 381        | 2           | 8                   | None                         | None                               | NT                                               | NT                                       | 2                  |                  | ADC-30              |            | +             | 0.75 ± 0.29                        | 0.87 ± 0.21                |
| A387   | 85  | Male   | Sputum               | -                       | Pneumology            | Guangdong | 806        | 215         | 8                   | <i>bla</i> <sub>TEM-ID</sub> | P4                                 | 1.07 ± 0.59                                      | 1.16 ± 0.11                              | 2                  |                  | ADC-30              |            | +             | 1.49 ± 1.07                        | 1.21 ± 0.29                |
| A396   | 80  | Male   | Sputum               | -                       | Cardiovascularology   | Guangdong | 806        | 215         | 8                   | <i>bla</i> <sub>TEM-ID</sub> | P4                                 | 1.46 ± 0.32                                      | 0.49 ± 0.41                              | 2                  |                  | ADC-30              |            | +             | 0.98 ± 0.62                        | 0.77 ± 0.33                |
| A2841  | 76  | Male   | -                    | -                       | Emergency             | Shanghai  | 643        | 2           | 8                   | None                         | None                               | NT                                               | NT                                       | 20                 |                  | ADC-73              |            | +             | 0.84 ± 0.36                        | 0.65 ± 0.34                |
| A101   | 42  | Male   | Sputum               | -                       | Neurosurgery          | Anhui     | 368        | 2           | 8                   | None                         | None                               | NT                                               | NT                                       | 2                  |                  | ADC-30              |            | +             | 0.56 ± 0.23                        | 0.92 ± 0.61                |
| SX5    | -   | -      | Sputum               | -                       | NICU                  | Zhejiang  | 208        | 2           | 8                   | None                         | None                               | NT                                               | NT                                       | 2                  |                  | ADC-30              |            | +             | 0.50 ± 0.24                        | 0.69 ± 0.27                |
| A1469  | 30  | Male   | Sputum               | Abdominal closed injury | ICU                   | Shanxi    | 643        | 2           | 16                  | None                         | None                               | NT                                               | NT                                       | 2                  |                  | ADC-30              |            | +             | 1.40 ± 0.73                        | 0.45 ± 0.11                |
| A468   | 78  | Female | Sputum               | Fracture                | Osteology             | Beijing   | 191        | 2           | 16                  | <i>bla</i> <sub>TEM-ID</sub> | P4                                 | 1.64 ± 0.11                                      | 0.70 ± 0.25                              | 2                  |                  | ADC-30              |            | +             | 0.86 ± 0.49                        | 1.12 ± 0.37                |
| A74    | 37  | Male   | Intravenous catheter | Burn                    | Burn                  | Anhui     | 191        | 2           | 16                  | None                         | None                               | NT                                               | NT                                       | 2                  |                  | ADC-30              |            | +             | 0.41 ± 0.11                        | 0.71 ± 0.17                |
| A97    | 57  | Female | -                    | -                       | Senior ward           | Anhui     | 368        | 2           | 16                  | None                         | None                               | NT                                               | NT                                       | 2                  |                  | ADC-30              |            | +             | 0.69 ± 0.06                        | 0.74 ± 0.09                |
| A107   | 47  | Male   | Sputum               | -                       | Senior ward           | Anhui     | 368        | 2           | 16                  | None                         | None                               | NT                                               | NT                                       | 2                  |                  | ADC-30              |            | +             | 0.72 ± 0.23                        | 0.83 ± 0.52                |
| A138   | -   | Male   | Sputum               | Renal insufficiency     | RICU                  | Xinjiang  | 642        | 23          | 16                  | None                         | None                               | NT                                               | NT                                       | 10                 |                  | ADC-76              |            | None          | 0.07 ± 0.01                        | 0.50 ± 0.03                |
| A141   | -   | Male   | Sputum               | Renal insufficiency     | ICU                   | Xinjiang  | 642        | 23          | 16                  | None                         | None                               | NT                                               | NT                                       | 10                 |                  | ADC-76              |            | None          | 0.07 ± 0.01                        | 0.96 ± 0.23                |
| A142   | -   | Male   | Sputum               | Subdural hematoma       | ICU                   | Xinjiang  | 642        | 23          | 16                  | None                         | None                               | NT                                               | NT                                       | 10                 |                  | ADC-76              |            | None          | 0.07 ± 0.01                        | 0.84 ± 0.26                |
| A173   | 87  | Male   | Sputum               | -                       | CCU                   | Xinjiang  | 191        | 2           | 16                  | <i>bla</i> <sub>TEM-ID</sub> | P4                                 | 1.46 ± 0.55                                      | 0.60 ± 0.27                              | 2                  |                  | ADC-30              |            | +             | 0.70 ± 0.29                        | 0.92 ± 0.17                |
| A205   | 59  | Female | Sputum               | -                       | -                     | Xinjiang  | 642        | 23          | 16                  | None                         | None                               | NT                                               | NT                                       | 10                 |                  | ADC-76              |            | None          | 0.02 ± 0.01                        | 1.27 ± 0.12                |
| A474   | 68  | Female | Sputum               | -                       | Emergency             | Beijing   | 520        | 40          | 16                  | None                         | None                               | NT                                               | NT                                       | 36                 |                  | ADC-155             |            | None          | 0.01 ± 0.00                        | 1.44 ± 0.10                |
| A75    | 37  | Male   | Burn                 | Burn                    | Burn                  | Anhui     | 191        | 2           | 32                  | <i>bla</i> <sub>TEM-ID</sub> | P4                                 | 0.97 ± 0.09                                      | 0.81 ± 0.05                              | 2                  |                  | ADC-30              |            | +             | 0.66 ± 0.49                        | 1.38 ± 0.75                |
| A78    | 76  | Female | Sputum               | -                       | Neurosurgery          | Anhui     | 191        | 2           | 32                  | <i>bla</i> <sub>TEM-ID</sub> | P4                                 | 1.58 ± 0.56                                      | 0.53 ± 0.08                              | 2                  |                  | ADC-30              |            | +             | 0.90 ± 0.41                        | 0.64 ± 38                  |
| A82    | 76  | Female | Sputum               | -                       | Senior ward           | Anhui     | 368        | 2           | 32                  | None                         | None                               | NT                                               | NT                                       | 2                  |                  | ADC-30              |            | +             | 0.63 ± 0.54                        | 0.88 ± 0.62                |
| A83    | 16  | Male   | Sputum               | -                       | Senior ward           | Anhui     | 540        | 2           | 32                  | <i>bla</i> <sub>TEM-ID</sub> | P4                                 | 1.22 ± 0.43                                      | 0.61 ± 0.19                              | 2                  |                  | ADC-30              |            | +             | 1.07 ± 0.83                        | 0.88 ± 0.39                |
| A84    | 82  | Male   | Sputum               | -                       | Pneumology            | Anhui     | 540        | 2           | 32                  | <i>bla</i> <sub>TEM-ID</sub> | P4                                 | 1.33 ± 0.17                                      | 0.78 ± 0.26                              | 2                  |                  | ADC-30              |            | +             | 0.79 ± 0.38                        | 0.77 ± 0.42                |
| A85    | 49  | Male   | fester               | -                       | Otolaryngology        | Anhui     | 540        | 2           | 32                  | <i>bla</i> <sub>TEM-ID</sub> | P4                                 | 1.10 ± 0.33                                      | 1.15 ± 0.10                              | 2                  |                  | ADC-30              |            | +             | 0.99 ± 0.60                        | 1.07 ± 0.14                |
| A87    | 79  | Female | Sputum               | -                       | Senior ward           | Anhui     | 208        | 2           | 32                  | <i>bla</i> <sub>TEM-ID</sub> | P4                                 | 1.61 ± 0.89                                      | 0.92 ± 0.45                              | 2                  |                  | ADC-30              |            | +             | 1.36 ± 0.57                        | 1.03 ± 0.03                |
| A93    | 43  | Female | Sputum               | -                       | Senior ward           | Anhui     | 368        | 2           | 32                  | None                         | None                               | NT                                               | NT                                       | 2                  |                  | ADC-30              |            | +             | 1.30 ± 0.70                        | 1.74 ± 0.58                |
| A94    | 77  | Male   | urine                | -                       | Urology               | Anhui     | 208        | 2           | 32                  | <i>bla</i> <sub>TEM-ID</sub> | P4                                 | 1.41 ± 0.21                                      | 0.53 ± 0.19                              | 2                  |                  | ADC-30              |            | +             | 1.34 ± 0.36                        | 0.74 ± 0.20                |
| A104   | 76  | Male   | Sputum               | -                       | Emergency             | Anhui     | 540        | 2           | 32                  | <i>bla</i> <sub>TEM-ID</sub> | P4                                 | 0.84 ± 0.22                                      | 0.99 ± 0.03                              | 2                  |                  | ADC-30              |            | +             | 0.77 ± 0.38                        | 0.65 ± 0.28                |
| A111   | 53  | Female | Sputum               | -                       | Senior ward           | Anhui     | 191        | 2           | 32                  | <i>bla</i> <sub>TEM-ID</sub> | P4                                 | 0.75 ± 0.07                                      | 0.71 ± 0.07                              | 2                  |                  | ADC-30              |            | +             | 0.58 ± 0.19                        | 0.58 ± 0.39                |
| A124   | -   | Male   | Purulent secretion   | Perianal abscess        | Emergency             | Xinjiang  | 208        | 2           | 32                  | <i>bla</i> <sub>TEM-ID</sub> | P4                                 | 1.00 ± 0.02                                      | 0.60 ± 0.08                              | 19                 |                  | ADC-25              |            | None          | 0.01 ± 0.00                        | 1.07 ± 0.13                |
| A132   | -   | Male   | Sputum               | Pulmonary infection     | ICU                   | Xinjiang  | 642        | 23          | 32                  | None                         | None                               | NT                                               | NT                                       | 10                 |                  | ADC-76              |            | None          | 0.02 ± 0.01                        | 1.09 ± 0.19                |
| A136   | -   | Male   | Sputum               | COPD                    | ICU                   | Xinjiang  | 642        | 23          | 32                  | None                         | None                               | NT                                               | NT                                       | 10                 |                  | ADC-76              |            | None          | 0.02 ± 0.01                        | 1.28 ± 0.19                |
| A157   | -   | Male   | Sputum               | Coronary heart disease  | ICU                   | Xinjiang  | 208        | 2           | 32                  | None                         | None                               | NT                                               | NT                                       | 19                 |                  | ADC-25              |            | None          | 0.01 ± 0.00                        | 0.58 ± 0.11                |
| A168   | -   | Female | Urine                | Chronic renal failure   | Nephrology            | Xinjiang  | 208        | 2           | 32                  | <i>bla</i> <sub>TEM-ID</sub> | P4                                 | 0.78 ± 0.14                                      | 0.60 ± 0.23                              | 19                 |                  | ADC-25              |            | None          | 0.01 ± 0.00                        | 0.93 ± 0.30                |
| A206   | 74  | Female | Sputum               | -                       | ICU                   | Xinjiang  | 191        | 2           | 32                  | <i>bla</i> <sub>TEM-ID</sub> | P4                                 | 1.08 ± 0.45                                      | 0.76 ± 0.44                              | 28                 |                  | ADC-30              |            | +             | 0.44 ± 0.03                        | 0.84 ± 0.52                |
| A370   | 61  | Female | Sputum               | -                       | ICU                   | Guangdong | 381        | 2           | 32                  | <i>bla</i> <sub>TEM-ID</sub> | P4                                 | 0.92 ± 0.13                                      | 1.49 ± 0.78                              | 2                  |                  | ADC-30              |            | +             | 0.63 ± 0.14                        | 1.41 ± 0.73                |
| A373   | 76  | Male   | Sputum               | -                       | Cardiovascularology   | Guangdong | 806        | 215         | 32                  | <i>bla</i> <sub>TEM-ID</sub> | P4                                 | 1.31 ± 0.69                                      | 0.74 ± 0.40                              | 2                  |                  | ADC-30              |            | +             | 0.48 ± 0.09                        | 0.84 ± 0.53                |
| A374   | 87  | Female | Sputum               | -                       | Cardiovascularology   | Guangdong | 457        | 2           | 32                  | <i>bla</i> <sub>TEM-ID</sub> | P4                                 | 2.80 ± 1.40                                      | 1.99 ± 0.55                              | 20                 |                  | ADC-73              |            | +             | 0.65 ± 0.09                        | 0.98 ± 0.12                |
| A376   | 65  | Male   | Intravenous catheter | -                       | Pneumology            | Guangdong | 806        | 215         | 32                  | <i>bla</i> <sub>TEM-ID</sub> | P4                                 | 2.71 ± 2.28                                      | 1.25 ± 0.42                              | 2                  |                  | ADC-30              |            | +             | 0.70 ± 0.32                        | 1.18 ± 0.12                |
| A378   | 73  | Male   | Sputum               | -                       | Hepatobiliary surgery | Guangdong | 381        | 2           | 32                  | <i>bla</i> <sub>TEM-ID</sub> | P4                                 | 1.11 ± 0.59                                      | 0.71 ± 0.21                              | 2                  |                  | ADC-30              |            | +             | 0.66 ± 0.02                        | 0.69 ± 0.19                |
| A379   | 89  | Female | Sputum               | -                       | Pneumology            | Guangdong | 381        | 2           | 32                  |                              |                                    |                                                  |                                          |                    |                  |                     |            |               |                                    |                            |

|       |     |        |                   |                                     |              |           |     |     |     |                              |    |              |             |    |        |      |             |             |
|-------|-----|--------|-------------------|-------------------------------------|--------------|-----------|-----|-----|-----|------------------------------|----|--------------|-------------|----|--------|------|-------------|-------------|
| A384  | 48  | Female | nasal swab        | -                                   | -            | Guangdong | 806 | 215 | 32  | <i>bla</i> <sub>TEM-ID</sub> | P4 | 1.44 ± 0.79  | 0.74 ± 0.39 | 2  | ADC-30 | +    | 0.74 ± 0.08 | 0.66 ± 0.45 |
| A385  | 55  | Female | lung tissue       | -                                   | Pneumology   | Guangdong | 381 | 2   | 32  | <i>bla</i> <sub>TEM-ID</sub> | P4 | 1.28 ± 0.39  | 0.69 ± 0.30 | 2  | ADC-30 | +    | 0.71 ± 0.35 | 0.69 ± 0.29 |
| A386  | 79  | Male   | Sputum            | -                                   | Pneumology   | Guangdong | 806 | 215 | 32  | <i>bla</i> <sub>TEM-ID</sub> | P4 | 1.68 ± 0.46  | 1.06 ± 0.30 | 2  | ADC-30 | +    | 0.62 ± 0.29 | 0.73 ± 0.16 |
| A394  | 86  | Female | Sputum            | -                                   | -            | Guangdong | 381 | 2   | 32  | <i>bla</i> <sub>TEM-ID</sub> | P4 | 0.98 ± 0.15  | 0.64 ± 0.17 | 2  | ADC-30 | +    | 0.48 ± 0.16 | 0.61 ± 0.19 |
| A403  | 63  | Female | Respiratory tract | -                                   | ICU          | Guangdong | 806 | 215 | 32  | <i>bla</i> <sub>TEM-ID</sub> | P4 | 1.73 ± 0.71  | 0.86 ± 0.27 | 2  | ADC-30 | +    | 0.46 ± 0.03 | 0.68 ± 0.45 |
| A92   | 53  | Female | Sputum            | -                                   | Emergency    | Anhui     | 540 | 2   | 64  | <i>bla</i> <sub>TEM-ID</sub> | P4 | 1.22 ± 0.19  | 1.07 ± 0.20 | 2  | ADC-30 | +    | 0.37 ± 0.01 | 0.88 ± 0.22 |
| A106  | 33  | Male   | Sputum            | -                                   | Senior ward  | Anhui     | 540 | 2   | 64  | <i>bla</i> <sub>TEM-ID</sub> | P4 | 1.24 ± 0.35  | 0.78 ± 0.56 | 2  | ADC-30 | +    | 0.48 ± 0.13 | 0.63 ± 0.27 |
| A115  | 71  | Male   | Sputum            | -                                   | Neurology    | Anhui     | 540 | 2   | 64  | <i>bla</i> <sub>TEM-ID</sub> | P4 | 1.19 ± 0.20  | 0.70 ± 0.22 | 2  | ADC-30 | +    | 0.60 ± 0.17 | 0.56 ± 0.27 |
| A186  | 75  | Male   | Sputum            | -                                   | ICU          | Xinjiang  | 452 | 2   | 64  | <i>bla</i> <sub>TEM-ID</sub> | P4 | 1.24 ± 0.18  | 0.97 ± 0.30 | 2  | ADC-30 | +    | 0.63 ± 0.26 | 0.63 ± 0.46 |
| A322  | 81  | Female | Sputum            | Cerebral hemorrhage                 | Neurosurgery | Liaoning  | 369 | 2   | 64  | <i>bla</i> <sub>TEM-ID</sub> | P4 | 1.00 ± 0.27  | 0.68 ± 0.42 | 2  | ADC-30 | +    | 0.58 ± 0.06 | 0.71 ± 0.35 |
| A325  | 75  | Female | Sputum            | Intracranial space-occupying lesion | Neurosurgery | Liaoning  | 369 | 2   | 64  | <i>bla</i> <sub>TEM-ID</sub> | P4 | 1.14 ± 0.37  | 0.79 ± 0.29 | 2  | ADC-30 | +    | 0.69 ± 0.31 | 0.71 ± 0.22 |
| A469  | 41  | Male   | Sputum            | OSAS                                | ICU          | Beijing   | 368 | 2   | 64  | <i>bla</i> <sub>TEM-ID</sub> | P4 | 1.00 ± 0.35  | 0.78 ± 0.33 | 19 | ADC-25 | None | 0.02 ± 0.01 | 1.30 ± 0.27 |
| ZS11  | 60d | Female | Sputum            | COPD                                | Pneumology   | Zhejiang  | 208 | 2   | 256 | <i>bla</i> <sub>TEM-ID</sub> | P4 | 2.67 ± 0.87  | 1.21 ± 0.60 | 20 | ADC-73 | +    | 0.66 ± 0.31 | 0.77 ± 0.33 |
| ZS3   | 77  | Female | Sputum            | Cerebral hemorrhage                 | Neurosurgery | Zhejiang  | 208 | 2   | 256 | <i>bla</i> <sub>TEM-ID</sub> | P4 | 11.38 ± 4.76 | 5.43 ± 0.95 | 20 | ADC-73 | +    | 0.32 ± 0.21 | 0.55 ± 0.03 |
| XH856 | -   | -      | -                 | -                                   | -            | -         | 381 | 2   | 64  | <i>bla</i> <sub>TEM-ID</sub> | P4 | 1.00 ± 0.15  | 1.00 ± 0.08 | 2  | ADC-30 | +    | 1.00 ± 0.18 | 1.12 ± 0.46 |

NOTE:

None, negative; +, positive; -, missing; NT, not tested.

**Table S3. The correlation between the *ampC* alleles and STs of the clinical isolates in the study.**

| <i>ampC</i> allele | Strain | ST(Pasteur) |
|--------------------|--------|-------------|
| 2                  | T17    | 2           |
|                    | A2986  | 2           |
|                    | A387   | 215         |
|                    | A396   | 215         |
|                    | A101   | 2           |
|                    | SX5    | 2           |
|                    | A1469  | 2           |
|                    | A468   | 2           |
|                    | A74    | 2           |
|                    | A97    | 2           |
|                    | A107   | 2           |
|                    | A173   | 2           |
|                    | A75    | 2           |
|                    | A78    | 2           |
|                    | A82    | 2           |
|                    | A83    | 2           |
|                    | A84    | 2           |
|                    | A85    | 2           |
|                    | A87    | 2           |
|                    | A93    | 2           |
|                    | A94    | 2           |
|                    | A104   | 2           |
|                    | A111   | 2           |
|                    | A370   | 2           |
|                    | A373   | 215         |
|                    | A376   | 215         |
|                    | A378   | 2           |
|                    | A379   | 2           |
|                    | A381   | 215         |
|                    | A384   | 215         |
|                    | A385   | 2           |
|                    | A386   | 215         |
|                    | A394   | 2           |
|                    | A403   | 215         |
|                    | A106   | 2           |
| A115               | 2      |             |
| A186               | 2      |             |
| A322               | 2      |             |
| A325               | 2      |             |
| 10                 | SH37   | 575         |
|                    | SH40   | 10          |
|                    | LS0148 | 10          |
|                    | P7     | 10          |
|                    | A2466  | 23          |
|                    | A138   | 23          |
|                    | A141   | 23          |
|                    | A142   | 23          |
|                    | A205   | Novel       |
|                    | A132   | 23          |
|                    | A136   | 23          |
|                    | 16     | SH27        |
| 19                 | A2265  | 2           |
|                    | A124   | 2           |
|                    | A157   | 2           |
|                    | A168   | 2           |

|    |        |      |
|----|--------|------|
|    | A469   | 2    |
| 20 | A2841  | 2    |
|    | A374   | 2    |
|    | ZS11   | 2    |
|    | ZS3    | 2    |
| 28 | A206   | 2    |
| 36 | A369   | 40   |
|    | JX106  | 40   |
|    | N9130  | 40   |
|    | CQ301  | 1159 |
|    | A474   | 40   |
| 38 | WE2714 | 52   |
| 40 | N5806  | 216  |
